# Supplementary material for: Wie evaluieren wir die Förderung von Qualität und Effizienz der allgemeinmedizinischen Weiterbildung durch die Kompetenzzentren?
Source: Springer Nature journal article supplement (doi:10.1007/s44266-022-00006-y), 2023-01-25
Supplement: MOESM1 [file 23953518]

Anlage: Qualitätsindikatoren und deren Priorisierung im Delphi-Panel

| 1.   | Inanspruchnahme / Teilnahmequoten                                                                                                                                                                                          | Mittel | Anzahl „hohe Priorität“ (2 Punkte) | Anzahl „geringe Priorität“ (1 Punkt) | Anzahl „keine Priorität“ (0 Punkte) | Anzahl Enthaltungen (keine Wertung) | Priorität | vergleiche externe Evaluation                  |
|------|----------------------------------------------------------------------------------------------------------------------------------------------------------------------------------------------------------------------------|--------|------------------------------------|--------------------------------------|-------------------------------------|-------------------------------------|-----------|------------------------------------------------|
| 1.1. | <b>Teilnahme ÄIW Seminare</b> a) Mind. 1 UE im Jahr<br>b) Mind. 50% des Angebotes c) 100 % des Angebotes                                                                                                                   | 1,86   | 12                                 | 2                                    | 0                                   | 2                                   | hoch      | a) –<br>b) [3]<br>3.12.;<br>[4] 5.2.<br>c) --- |
| 1.2. | <b>Anzahl eingeschriebene ÄIW</b> a) Anzahl absolut<br>b) Delta im vgl. zum Vorjahr c) Anteil aller ÄIW (zum Zeitpunkt der Facharztprüfung) d) Anteil ÄIW FA AM (eingeschriebene ÄIW vs. Nicht eingeschriebener zum FA AM) | 1,85   | 11                                 | 2                                    | 0                                   | 3                                   | hoch      | a) [4] 5.1<br>b) –<br>c) –<br>d) --            |
| 1.3. | Inanspruchnahme während der <b>ambulanten Weiterbildungsphase</b> a) absolut b) prozentualer Anteil der KV-geförderten ÄIW                                                                                                 | 1,79   | 12                                 | 1                                    | 1                                   | 2                                   | hoch      | a) –<br>b) --                                  |
| 1.4. | Inanspruchnahme während der <b>stationären Weiterbildungsphase</b> a) absolut, b) Anteil DKG-                                                                                                                              | 1,71   | 11                                 | 2                                    | 1                                   | 2                                   | hoch      | a) –<br>b) --                                  |

|      |                                                                                                                                                                                                                                                                                                              |      |    |   |   |   |      |                                 |
|------|--------------------------------------------------------------------------------------------------------------------------------------------------------------------------------------------------------------------------------------------------------------------------------------------------------------|------|----|---|---|---|------|---------------------------------|
|      | Förderung c) Anteil nicht-KV-geförderter ÄIW (stationäre Phase + Elternzeit)                                                                                                                                                                                                                                 |      |    |   |   |   |      |                                 |
| 1.5. | <b>Teilnahme ÄIW Mentoring</b> a) 1 UE im Jahr b) Mind. 50% des Angebotes c) Mind. 100 % des Angebotes                                                                                                                                                                                                       | 1,64 | 10 | 3 | 1 | 2 | hoch | a) [4] 5.3.<br>b) ---<br>c) --- |
| 1.6. | <b>Teilnahme WBB TTT</b> (Basistraining und Folge-TTT / sonstige Qualifikationsprogramme (incl. Mentor*innenschulungen, Dozent*innenschulungen / Aufbauschulungen) a) Weiterbilder absolut b) Anteil der WBB                                                                                                 | 1,54 | 8  | 4 | 1 | 3 | hoch | a) [4] 5.4.<br>b) ----          |
| 1.7. | <b>Gründe für Nicht-Teilnahme an KW Angeboten von ÄIW</b> (mangelnde Information, Vorbehalte, Datenschutzbedenken, fehlendes Commitment für die Allgemeinmedizin, fehlendes Problembewusstsein, mangelnde Attraktivität des Angebotes, fehlende Verpflichtung, mangelnde Freistellung durch Arbeitgeber ...) | 1,54 | 8  | 4 | 1 | 3 | hoch | [4] 5.1.6.                      |
| 1.8. | <b>Gründe für Nicht-Teilnahme an KW Angeboten von WBB</b> (mangelnde Information, Vorbehalte, Datenschutzbedenken, fehlendes                                                                                                                                                                                 | 1,54 | 8  | 4 | 1 | 3 | hoch | [4] 5.4.11.                     |

|       |                                                                                                                                                 |               |                                           |                                             |                                            |                                            |                  |                                      |
|-------|-------------------------------------------------------------------------------------------------------------------------------------------------|---------------|-------------------------------------------|---------------------------------------------|--------------------------------------------|--------------------------------------------|------------------|--------------------------------------|
|       | Problembewusstsein, mangelnde Attraktivität des Angebotes, fehlende Verpflichtung, fehlende zeitliche Ressourcen ...)                           |               |                                           |                                             |                                            |                                            |                  |                                      |
| 1.9.  | <b>Anzahl kooperierender WBB</b> a) -absolut, b) prozentualer Anteil allgemeinmedizinisch ambulant tätiger WBB c) prozentualer Anteil aller WBB | 1,21          | 5                                         | 7                                           | 2                                          | 2                                          | mittel           | a) [3] 3.2.2<br>b) –<br>c) --        |
| 1.10. | <b>Kontinuität der Wahrnehmung des Angebotes</b> (Anteil besuchter Veranstaltungen vom vorgesehenen Soll)                                       | 1,08          | 4                                         | 5                                           | 3                                          | 4                                          | mittel           | --                                   |
| 1.11. | <b>Anzahl „geförderte Weiterbildung“</b> in der Region als Indikator für Attraktivität des Fachgebietes im vgl. zum Vorjahr                     | 0,92          | 4                                         | 4                                           | 5                                          | 3                                          | gering           | [2] 3.4.                             |
| 2.    | <b>Qualität der praktischen Weiterbildung in der Wahrnehmung der Teilnehmer*innen</b>                                                           | <b>Mittel</b> | <b>Anzahl „hohe Priorität“ (2 Punkte)</b> | <b>Anzahl „geringe Priorität“ (1 Punkt)</b> | <b>Anzahl „keine Priorität“ (0 Punkte)</b> | <b>Anzahl Enthaltungen (keine Wertung)</b> | <b>Priorität</b> | <b>vergleiche externe Evaluation</b> |
| 2.1.  | <b>Betreuung / Feedback durch WBB - ÄIW</b> bewerten WBB (WBB im KW geschult vs. Nicht geschult)                                                | 1,57          | 11                                        | 0                                           | 3                                          | 2                                          | hoch             | [4] 9.1.                             |

|      |                                                                                                                                                             |               |                                                       |                                                         |                                                        |                                                         |                  |                                              |
|------|-------------------------------------------------------------------------------------------------------------------------------------------------------------|---------------|-------------------------------------------------------|---------------------------------------------------------|--------------------------------------------------------|---------------------------------------------------------|------------------|----------------------------------------------|
| 2.2. | <b>Zufriedenheit mit WBB</b> (fachlich/didaktisch)<br>(WBB im KW geschult vs. Nicht geschult)                                                               | 1,57          | 11                                                    | 0                                                       | 3                                                      | 2                                                       | hoch             | [4] 9.1.                                     |
| 2.3. | <b>Kompetenzerleben / Selbsteinschätzung:</b><br>Zugewinn an Sicherheit, Berufssicherheit durch<br>praktische WB (WBB im KW geschult vs. Nicht<br>geschult) | 1,57          | 11                                                    | 0                                                       | 3                                                      | 2                                                       | hoch             | [4] 9.1.                                     |
| 2.4. | <b>Strukturierung praktische Weiterbildung</b> (WBB<br>im KW geschult vs. Nicht geschult)                                                                   | 1,50          | 10                                                    | 1                                                       | 3                                                      | 2                                                       | hoch             | [4] 9.1.                                     |
| 2.5. | Angebot / Möglichkeit zur Wahrnehmung einer<br><b>Verbundweiterbildung</b>                                                                                  | 1,07          | 4                                                     | 7                                                       | 3                                                      | 2                                                       | mittel           | [4] 5.1.4.6.                                 |
| 3.   | <b>KW-Angebote &amp; Effekte in der Wahrnehmung<br/>der Teilnehmer*innen</b>                                                                                | <b>Mittel</b> | <b>Anzahl<br/>„hohe<br/>Priorität“<br/>(2 Punkte)</b> | <b>Anzahl<br/>„geringe<br/>Priorität“<br/>(1 Punkt)</b> | <b>Anzahl<br/>„keine<br/>Priorität“<br/>(0 Punkte)</b> | <b>Anzahl<br/>Enthaltunge<br/>n (keine<br/>Wertung)</b> | <b>Priorität</b> | <b>vergleiche<br/>externe<br/>Evaluation</b> |
| 3.1. | <b>Spezifischer subjektiver Kompetenzzuwachs</b><br>vorher/nachher in ausgewählten Items;<br>(subjektive) Verhaltens- / Handlungsänderung                   | 1,67          | 12                                                    | 1                                                       | 2                                                      | 1                                                       | hoch             | [4] 8.3.                                     |
| 3.2. | <b>professionelles Verhalten:</b> Umgang mit<br>Unsicherheit, Resilienz, Berufszufriedenheit,                                                               | 1,64          | 11                                                    | 1                                                       | 2                                                      | 2                                                       | hoch             | [4] 8.3.                                     |

|      |                                                                                                                                                           |               |                                           |                                             |                                            |                                            |                  |                                      |
|------|-----------------------------------------------------------------------------------------------------------------------------------------------------------|---------------|-------------------------------------------|---------------------------------------------|--------------------------------------------|--------------------------------------------|------------------|--------------------------------------|
|      | Ärztegesundheit, Selbstfürsorge, Abbau von Ängsten                                                                                                        |               |                                           |                                             |                                            |                                            |                  |                                      |
| 3.3. | <b>kollegialer Austausch / Netzwerkbildung.</b><br>Austausch mit Peers / Netzwerkbildung, soziale Eingebundenheit (psycholog. Inventar, Selbstbestimmung) | 1,60          | 11                                        | 2                                           | 2                                          | 1                                          | hoch             | [4] 9.1.; 9.2.                       |
| 3.4. | Einflüsse auf <b>hausärztliche Identität &amp; Selbstbewusstsein</b>                                                                                      | 1,53          | 10                                        | 3                                           | 2                                          | 1                                          | hoch             | [4] 8.4.                             |
| 3.5. | <b>Wahrnehmung von KW-Seminarangeboten</b> und deren Bewertung durch Teilnehmer*innen                                                                     | 1,53          | 10                                        | 3                                           | 2                                          | 1                                          | hoch             | [4] 4.5.; 5.2. 6.2.                  |
| 3.6. | <b>Wahrnehmung von KW-Mentoringangeboten</b> und deren Bewertung durch Teilnehmer*innen                                                                   | 1,53          | 10                                        | 3                                           | 2                                          | 1                                          | hoch             | [4] 4.6., 5.3., 6.3.                 |
| 3.7. | <b>Selbsteinschätzung zur Verbesserung der Versorgungsqualität</b> durch KW-Angebote                                                                      | 1,53          | 10                                        | 3                                           | 2                                          | 1                                          | hoch             | --                                   |
| 4.   | <b>Organisation / Service in der Wahrnehmung der Teilnehmer*innen</b>                                                                                     | <b>Mittel</b> | <b>Anzahl „hohe Priorität“ (2 Punkte)</b> | <b>Anzahl „geringe Priorität“ (1 Punkt)</b> | <b>Anzahl „keine Priorität“ (0 Punkte)</b> | <b>Anzahl Enthaltungen (keine Wertung)</b> | <b>Priorität</b> | <b>vergleiche externe Evaluation</b> |

|           |                                                                                                             |               |                                           |                                             |                                            |                                            |                  |                                      |
|-----------|-------------------------------------------------------------------------------------------------------------|---------------|-------------------------------------------|---------------------------------------------|--------------------------------------------|--------------------------------------------|------------------|--------------------------------------|
| 4.1.      | <b>Angebote zur Beratung zum Thema Weiterbildung</b> (durch wen? Inhalte? Aufeinander abgestimmt?)          | 1,21          | 7                                         | 3                                           | 4                                          | 2                                          | mittel           | --                                   |
| 4.2.      | <b>Bürokratie / Steine im Weg bei Vorbereitung FA</b>                                                       | 1,13          | 6                                         | 5                                           | 4                                          | 1                                          | mittel           | --                                   |
| 4.3.      | <b>Service &amp; Erreichbarkeit</b> Kammer / KV / KOSTA / KW                                                | 1,07          | 5                                         | 6                                           | 4                                          | 1                                          | mittel           | [4] 6.1.                             |
| 4.4.      | <b>Koordination WB / WBV</b> (Lücken), Tauschbörse, Stellen                                                 | 0,87          | 3                                         | 7                                           | 5                                          | 1                                          | gering           | --                                   |
| <b>5.</b> | <b>Objektivierte Kompetenzmessungen</b>                                                                     | <b>Mittel</b> | <b>Anzahl „hohe Priorität“ (2 Punkte)</b> | <b>Anzahl „geringe Priorität“ (1 Punkt)</b> | <b>Anzahl „keine Priorität“ (0 Punkte)</b> | <b>Anzahl Enthaltungen (keine Wertung)</b> | <b>Priorität</b> | <b>vergleiche externe Evaluation</b> |
| 5.1.      | <b>Progress Test Weiterbildung</b> (Modell NL)                                                              | 1,08          | 4                                         | 5                                           | 3                                          | 4                                          | mittel           | --                                   |
| 5.2.      | <b>Facharztprüfung:</b> Erfolgsquote, wie gut abgeschlossen (Protokolle / Checkliste?, informelle Benotung) | 1,00          | 4                                         | 5                                           | 4                                          | 3                                          | mittel           | --                                   |
| 5.3.      | <b>Fremdeinschätzung</b> von ÄIW (durch WBB)                                                                | 0,92          | 3                                         | 6                                           | 4                                          | 3                                          | gering           | --                                   |

|      |                                                                                                                         |               |                                           |                                             |                                            |                                            |                  |                                      |
|------|-------------------------------------------------------------------------------------------------------------------------|---------------|-------------------------------------------|---------------------------------------------|--------------------------------------------|--------------------------------------------|------------------|--------------------------------------|
| 5.4. | <b>Fallvignetten</b> (gesonderte praktisch / mündliche oder schriftliche Prüfung)                                       | 0,92          | 3                                         | 5                                           | 4                                          | 4                                          | gering           | --                                   |
| 5.5. | <b>Videofeedback</b> von Interventionen, klinischen Untersuchungen, Konsultationen (z.B. Consultation observation Tool) | 0,92          | 3                                         | 5                                           | 4                                          | 4                                          | gering           | --                                   |
| 5.6. | <b>Qualitative Beschreibung</b> , wie sich der/die ÄiW bewährt? (Weiterbildungszeugnis, informelle Benotung)            | 0,85          | 2                                         | 7                                           | 4                                          | 3                                          | gering           | --                                   |
| 5.7. | <b>OSCE</b>                                                                                                             | 0,67          | 2                                         | 4                                           | 6                                          | 4                                          | gering           | --                                   |
| 5.8. | <b>Objektivierte Verhaltensbeobachtung</b>                                                                              | 0,67          | 1                                         | 6                                           | 5                                          | 4                                          | gering           | --                                   |
| 5.9. | Befragung zu einzelnen inhaltlichen Aspekten der Weiterbildung als <b>Multiple Choice-Fragen</b>                        | 0,67          | 2                                         | 4                                           | 6                                          | 4                                          | gering           | --                                   |
| 6.   | <b>Erfolgs-/ Abschlussquoten und Drop-outs</b>                                                                          | <b>Mittel</b> | <b>Anzahl „hohe Priorität“ (2 Punkte)</b> | <b>Anzahl „geringe Priorität“ (1 Punkt)</b> | <b>Anzahl „keine Priorität“ (0 Punkte)</b> | <b>Anzahl Enthaltungen (keine Wertung)</b> | <b>Priorität</b> | <b>vergleiche externe Evaluation</b> |
| 6.1. | <b>Motive für Abbruch</b> a) Weiterbildung AM b) KW Teilnahme (beinhaltet: Wegzug / Zuzug aus anderem Bundesland)       | 1,60          | 11                                        | 2                                           | 2                                          | 1                                          | hoch             | a) ---<br>b) [4]<br>5.1.5.           |

|           |                                                                                                                                                                                                           |               |                                           |                                             |                                            |                                            |                  |                                      |
|-----------|-----------------------------------------------------------------------------------------------------------------------------------------------------------------------------------------------------------|---------------|-------------------------------------------|---------------------------------------------|--------------------------------------------|--------------------------------------------|------------------|--------------------------------------|
| 6.2.      | <b>Abbruch Quote</b> a) Weiterbildung AM b) KW Teilnahme                                                                                                                                                  | 1,57          | 10                                        | 2                                           | 2                                          | 2                                          | hoch             | a) –<br>b) [4]<br>5.1.5.             |
| 6.3.      | <b>Nicht beendete/ ausgeschöpfte Förderung</b>                                                                                                                                                            | 1,43          | 7                                         | 6                                           | 1                                          | 2                                          | mittel           | ---                                  |
| <b>7.</b> | <b>Versorgungsqualität und –quantität</b>                                                                                                                                                                 | <b>Mittel</b> | <b>Anzahl „hohe Priorität“ (2 Punkte)</b> | <b>Anzahl „geringe Priorität“ (1 Punkt)</b> | <b>Anzahl „keine Priorität“ (0 Punkte)</b> | <b>Anzahl Enthaltungen (keine Wertung)</b> | <b>Priorität</b> | <b>vergleiche externe Evaluation</b> |
| 7.1.      | <b>Absolventenbefragung nach 5 Jahren.</b> z.B. Welche Bestandteile der Weiterbildung haben retrospektiv am meisten / am wenigsten zu meiner Facharztkompetenz beigetragen? (z.B. qualitative Interviews) | 1,50          | 9                                         | 3                                           | 2                                          | 2                                          | hoch             | ---                                  |
| 7.2.      | <b>FA AM in der Region</b> a) Anzahl Köpfe b) Vollzeitäquivalente c) Vollzeitäquivalente x Jahre Berufstätigkeit) – „Nachhaltigkeit“                                                                      | 1,33          | 6                                         | 4                                           | 2                                          | 4                                          | mittel           | ---                                  |
| 7.3.      | <b>Tätigkeit auf dem Land</b>                                                                                                                                                                             | 1,33          | 6                                         | 4                                           | 2                                          | 4                                          | mittel           | ---                                  |
| 7.4.      | <b>Bessere Standards / weniger Heterogenität in der Versorgung.</b> Mögliche Qualitätsparameter: Leitlinienadhärenz in der Versorgung z.B.                                                                | 1,17          | 4                                         | 6                                           | 2                                          | 4                                          | mittel           | ---                                  |



|           |                                                                                                                                   |               |                                                       |                                                         |                                                        |                                                        |                  |                                              |
|-----------|-----------------------------------------------------------------------------------------------------------------------------------|---------------|-------------------------------------------------------|---------------------------------------------------------|--------------------------------------------------------|--------------------------------------------------------|------------------|----------------------------------------------|
|           | Antibiotikaverordnungen, weniger obsolete<br>Behandlungsverfahren ...                                                             |               |                                                       |                                                         |                                                        |                                                        |                  |                                              |
| 7.5.      | <b>Vertragsärztliche Tätigkeit</b><br>(Niederlassungsquote & angestelltes Arbeiten)                                               | 1,17          | 4                                                     | 6                                                       | 2                                                      | 4                                                      | mittel           | [4] 5.1.4.3.                                 |
| 7.6.      | <b>Eignungsprüfung</b> für die Weiterbildung zum FA<br>Allgemeinmedizin                                                           | 0,67          | 3                                                     | 2                                                       | 7                                                      | 4                                                      | gering           | ---                                          |
| <b>8.</b> | <b>Allgemeine Effekte / Absolventen als<br/>Rollenmodell (CAN MED)</b>                                                            | <b>Mittel</b> | <b>Anzahl<br/>„hohe<br/>Priorität“<br/>(2 Punkte)</b> | <b>Anzahl<br/>„geringe<br/>Priorität“<br/>(1 Punkt)</b> | <b>Anzahl<br/>„keine<br/>Priorität“<br/>(0 Punkte)</b> | <b>Anzahl<br/>Enthaltungen<br/>(keine<br/>Wertung)</b> | <b>Priorität</b> | <b>vergleiche<br/>externe<br/>Evaluation</b> |
| 8.1.      | <b>Förderung von Resilienz</b> durch die<br>Weiterbildung                                                                         | 1,00          | 4                                                     | 5                                                       | 4                                                      | 3                                                      | mittel           | ---                                          |
| 8.2.      | <b>Arbeitszufriedenheit</b> unter Teilnehmer*innen                                                                                | 0,93          | 5                                                     | 3                                                       | 6                                                      | 2                                                      | gering           | ---                                          |
| 8.3.      | Anteil „ <b>aktiver Teilnehmer*innen</b> “ unter den<br>Eingeschriebenen ( <i>Mitgestaltung von Seminaren<br/>und Mentoring</i> ) | 0,86          | 4                                                     | 4                                                       | 6                                                      | 2                                                      | gering           | ---                                          |

|      |                                                                                                           |               |                                           |                                             |                                            |                                            |                  |                                      |
|------|-----------------------------------------------------------------------------------------------------------|---------------|-------------------------------------------|---------------------------------------------|--------------------------------------------|--------------------------------------------|------------------|--------------------------------------|
| 8.4. | <b>Akzeptanz der Allgemeinmedizin</b> unter Studierenden, Fachkolleg*innen und in der Gesellschaft steigt | 0,71          | 2                                         | 6                                           | 6                                          | 2                                          | gering           | ---                                  |
| 8.5. | <b>Beteiligung Absolvent*innen in Körperschaften</b> (Kammer/KV)                                          | 0,64          | 2                                         | 5                                           | 7                                          | 2                                          | gering           | ---                                  |
| 8.6. | <b>KWs auch in anderen Fachgruppen</b>                                                                    | 0,64          | 1                                         | 7                                           | 6                                          | 2                                          | gering           | ---                                  |
| 8.7. | <b>Anteil TN als Lehrende</b> (müsste noch genauer definiert werden)                                      | 0,50          | 0                                         | 7                                           | 7                                          | 2                                          | gering           | ---                                  |
| 8.8. | <b>Anteil TN in Forschung</b> / Anteil Absolvent*innen mit Promotion                                      | 0,50          | 0                                         | 7                                           | 7                                          | 2                                          | gering           | ---                                  |
| 9.   | <b>Effizienz / Weiterbildungsdauer</b>                                                                    | <b>Mittel</b> | <b>Anzahl „hohe Priorität“ (2 Punkte)</b> | <b>Anzahl „geringe Priorität“ (1 Punkt)</b> | <b>Anzahl „keine Priorität“ (0 Punkte)</b> | <b>Anzahl Enthaltungen (keine Wertung)</b> | <b>Priorität</b> | <b>vergleiche externe Evaluation</b> |
| 9.1. | <b>Anteil Facharztprüfungen Allgemeinmedizin</b> a) absolut b) KW+ vs. KW- c) AM vs. restliche Fächer     | 1,79          | 11                                        | 3                                           | 0                                          | 2                                          | hoch             | a) [2,3] 3.9.<br>b) –<br>c)---       |

|      |                                                                                                                                     |      |    |   |   |   |        |              |
|------|-------------------------------------------------------------------------------------------------------------------------------------|------|----|---|---|---|--------|--------------|
| 9.2. | <b>Auf die Facharztweiterbildung anrechenbare Monate</b> – „Netto“ / ohne Pausenzeiten (gewollt / ungewollt)                        | 1,60 | 10 | 4 | 1 | 1 | hoch   | --           |
| 9.3. | <b>Gesamte Dauer der Weiterbildung</b> – „brutto“ incl. Pausenzeiten (gewollt / ungewollt)                                          | 1,53 | 9  | 5 | 1 | 1 | hoch   | --           |
| 9.4. | <b>Umfang der Weiterbildungsstelle</b> (Teilzeit/Vollzeit)                                                                          | 1,50 | 7  | 7 | 0 | 2 | hoch   | [2] 3.1.     |
| 9.5. | Teilnahme an <b>Verbundweiterbildung</b>                                                                                            | 1,40 | 8  | 5 | 2 | 1 | mittel | [4] 5.1.4.6. |
| 9.6. | <b>Nahtlose Anknüpfung ans Studium</b> – Erleichterung, Anteil Ambolvent*innen mit direkter/ gezielter hausärztlicher Weiterbildung | 1,40 | 8  | 5 | 2 | 1 | mittel | [4] 5.1.4.5. |
| 9.7. | <b>Anteil Quereinsteiger*innen vs. Direkteinsteiger*innen</b>                                                                       | 1,36 | 6  | 7 | 1 | 2 | mittel | [4] 5.1.4.2. |
| 9.8. | <b>Alter bei FA-Anerkennung</b>                                                                                                     | 1,07 | 4  | 8 | 3 | 1 | mittel | --           |
